# Supplementary material for: Darkfield colors from multi-periodic arrays of gap plasmon resonators
Source: publisher site journal article supplement (doi:10.1515/nanoph-2019-0414), 2019-12-27
Supplement: Supplementary file 1 [file nanoph-2019-0414_suppl.docx]

Supplementary Information:

Darkfield colors from multi-periodic arrays of gap plasmon resonators


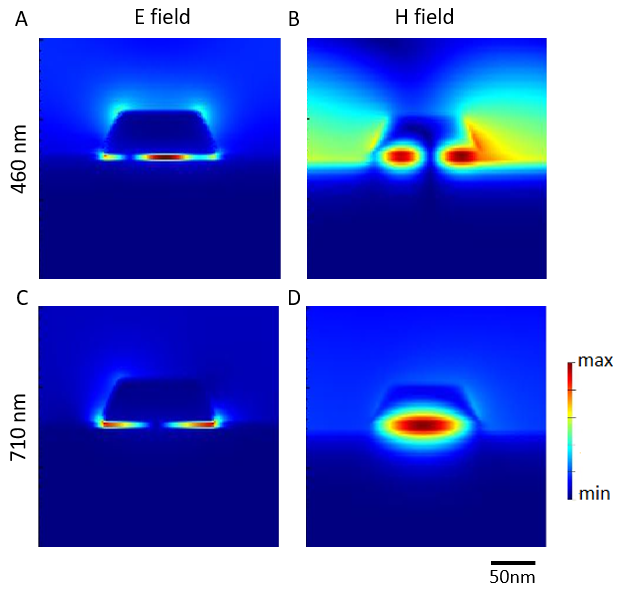


**Fig. S1** (a) Electric field and (b) magnetic field for a square array of 120 nm wide Al disks with a period of 240 nm at a wavelength of 460 nm, corresponding to the second-order plasmon resonance mode. (c) Electric field and (d) magnetic field for the same array at a wavelength of 710 nm, corresponding to the first-order plasmon resonance mode.


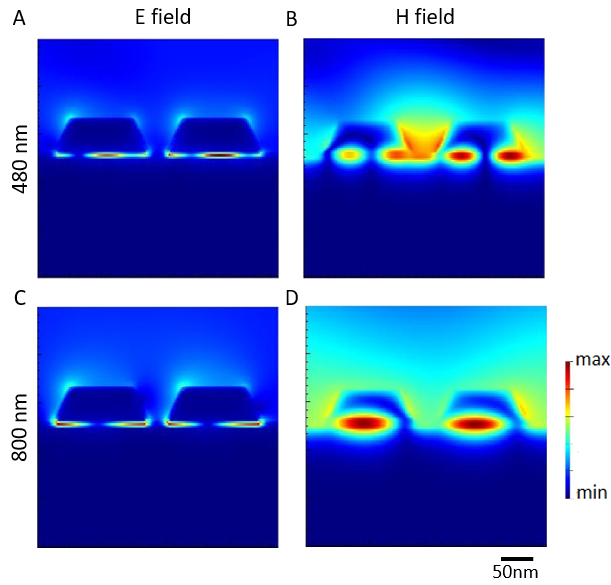


**Fig. S2** (a) Electric field and (b) magnetic field for a square array of 120 nm wide Al disk clusters with an inter-disk gap g1 of 20 nm and a period of 380 nm, at a wavelength of 480 nm, corresponding to the second-order plasmon resonance mode. (c) Electric field and (d) magnetic field for the same array at a wavelength of 800 nm, corresponding to the first-order plasmon resonance mode.
